# Supplementary material for: Sources and nature of ice-nucleating particles in the free troposphere at Jungfraujoch in winter 2017
Source: Copernicus journal article supplement (doi:10.5194/acp-2021-415), 2021-06-16
Supplement: Supplementary file 1 [file acp-2021-415-supplement.pdf]

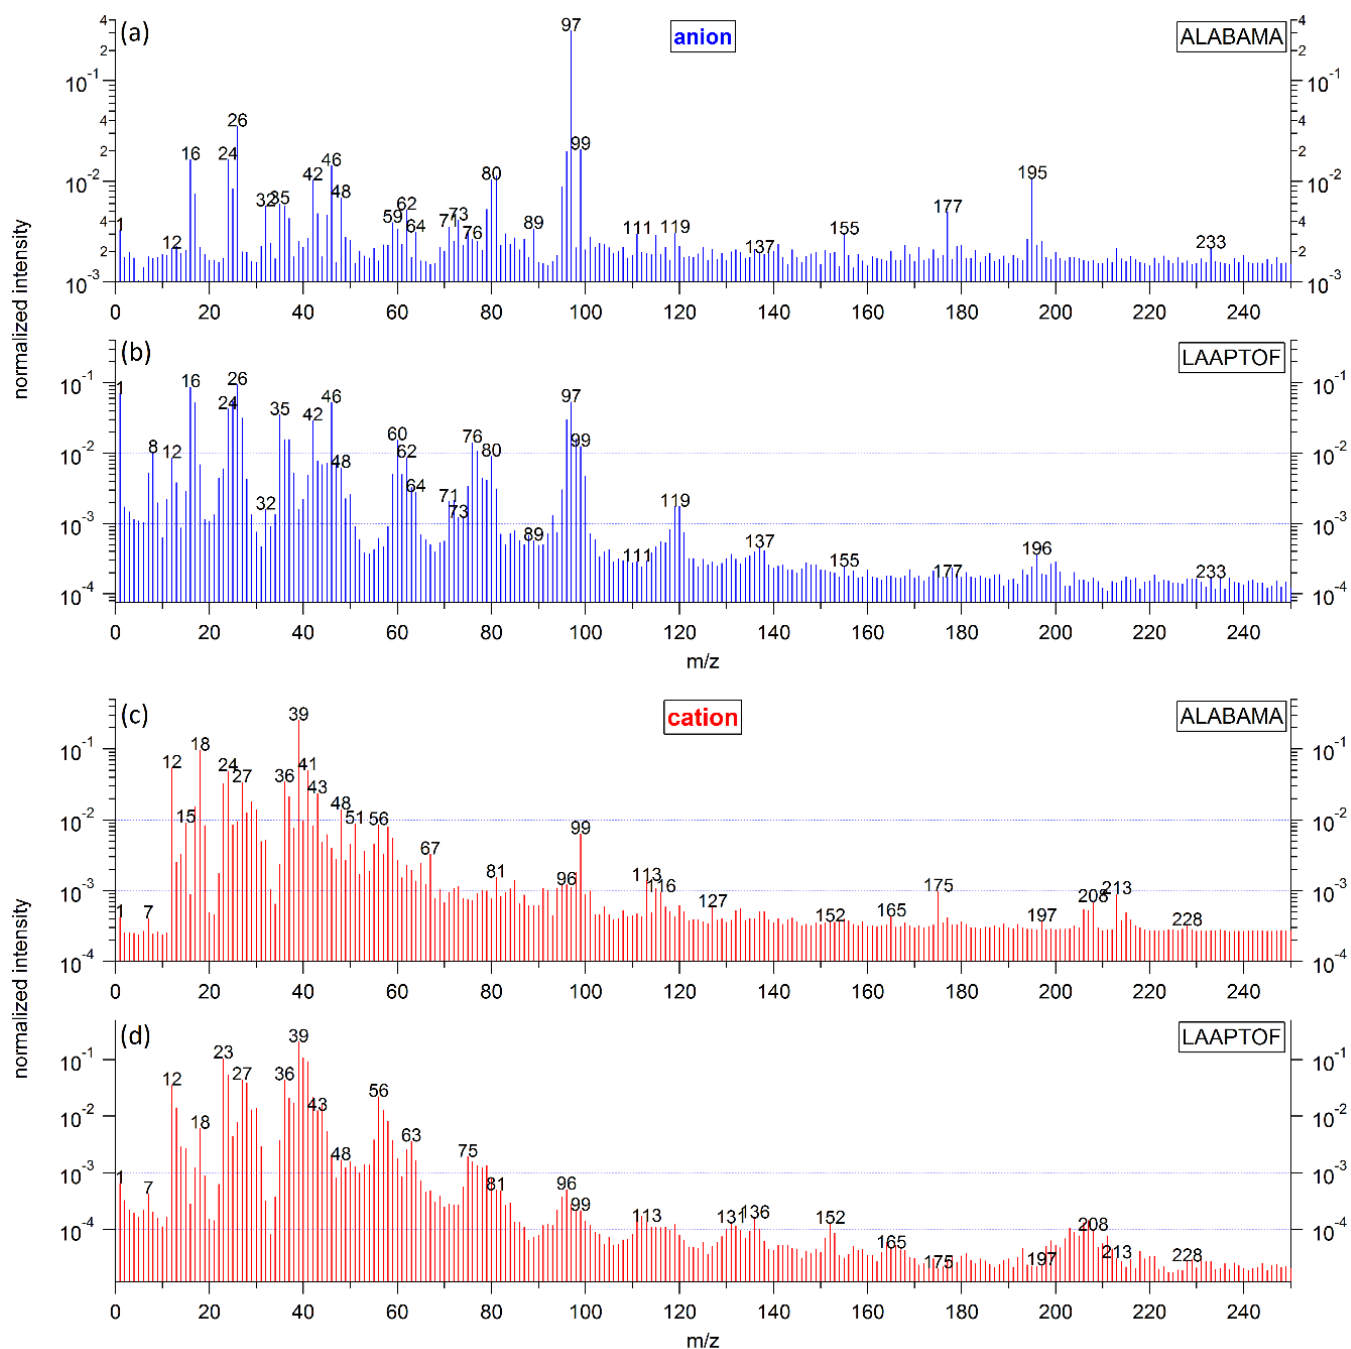

Figure S1: Comparison of the averaged anion and cation mass spectra detected by ALABAMA (panel a, c) and LAAPTOF (panel b, d) over a period of 24 hours with parallel sampling (12:00 14.02.2017 - 12:00 15.02.2017). The number of averaged mass spectra is 146498 for the ALABAMA and 4709 for the LAAPTOF. A correlation of the two averaged mass spectra results in a spearman's rank correlation coefficient of 0.81 for the anion mass spectra, and of 0.59 for the cation mass spectra.

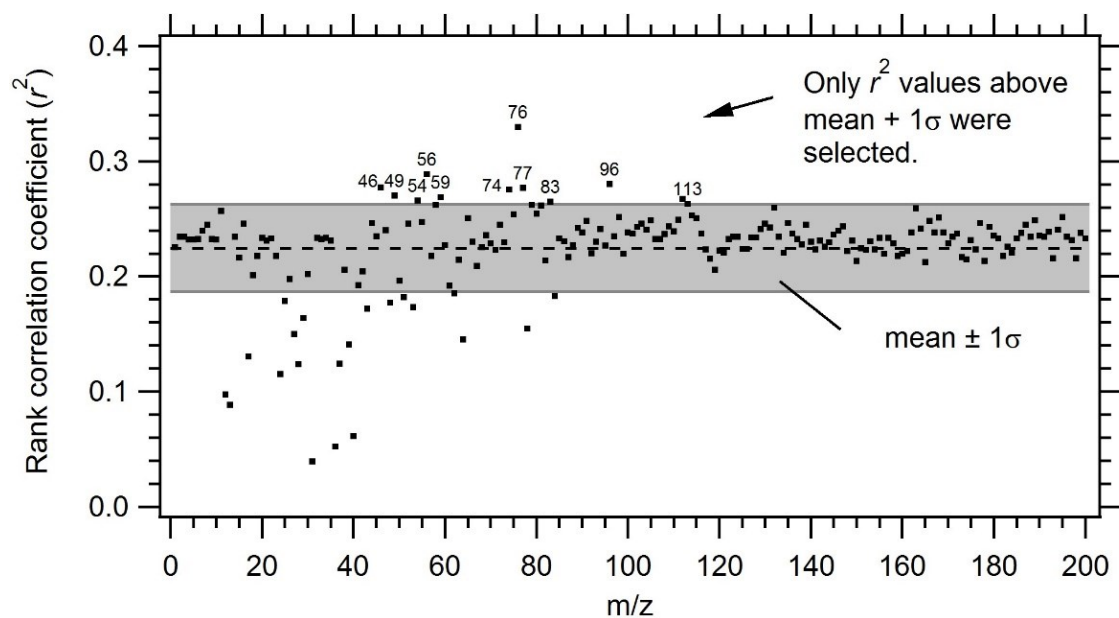

Figure S2: Squared ranked correlation coefficients ( $r^2$ ) for INP concentrations with the m/z ratios from ALABAMA; we consider a coefficient ( $r$ ) to be meaningful only when the  $r^2$  is above the mean  $\pm 1$  standard deviation ( $1\sigma$ ) outside the grey shaded region).

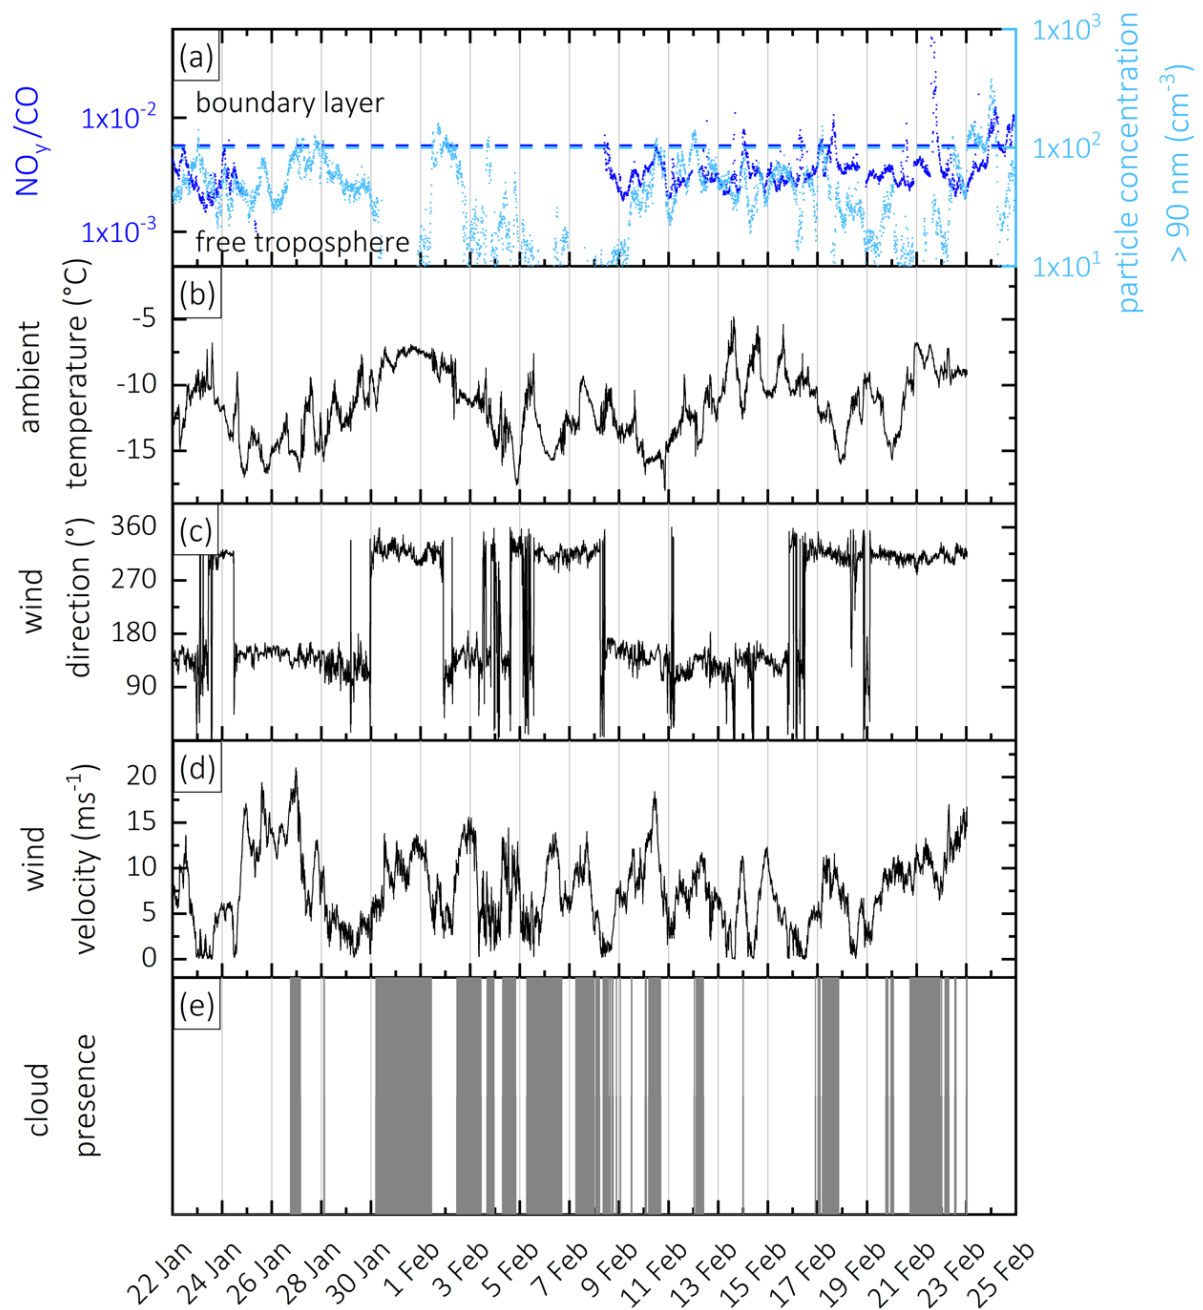

Figure S3: Timeseries of (panel a) reactive nitrogen to carbon monoxide ratio ( $\text{NO}_y/\text{CO}$ ) and particle concentration  $> 90 \text{ nm}$  to distinguish free tropospheric sampling conditions at JFJ, dashed line represents threshold values 0.0057 ( $\text{NO}_y/\text{CO}$ ; Zellweger et al., 2003) and  $100 \text{ cm}^{-3}$  (particle concentration  $>90 \text{ nm}$ , Herrmann et al., 2015), below which the station is in the free troposphere; (panel b) ambient temperature; (panel c) wind direction; (panel d) wind velocity; (panel e) cloud presence.

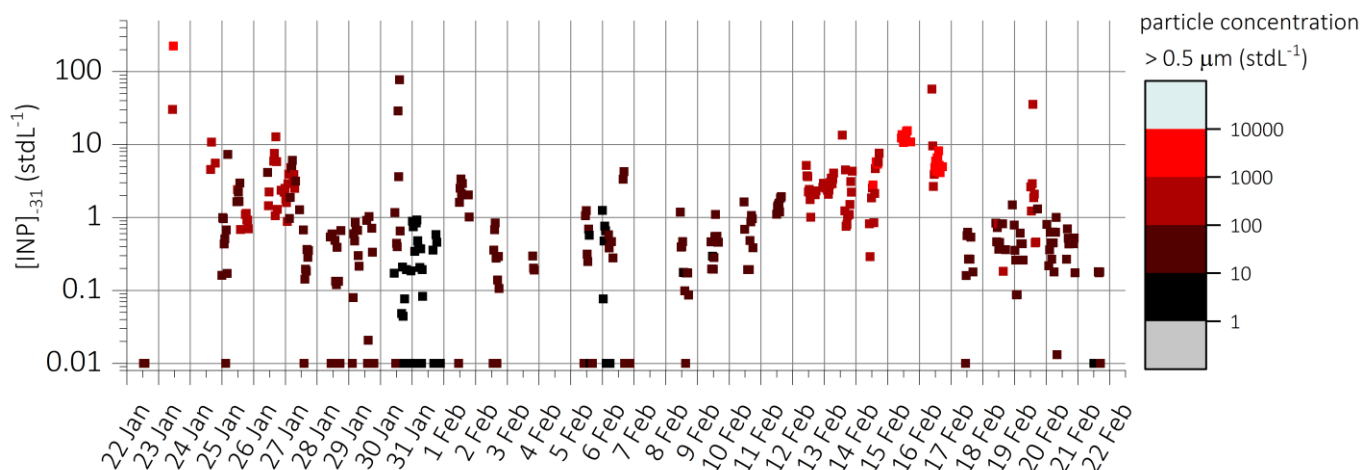

Figure S4: Timeseries of  $[INP]_{-31}$  color coded according to particle concentration  $> 0.5 \mu\text{m}$  ( $\text{stdL}^{-1}$ ) showing elevated INP concentrations between January 22 – 27 and February 11 – 17 occur simultaneously with a higher fraction of larger particles.

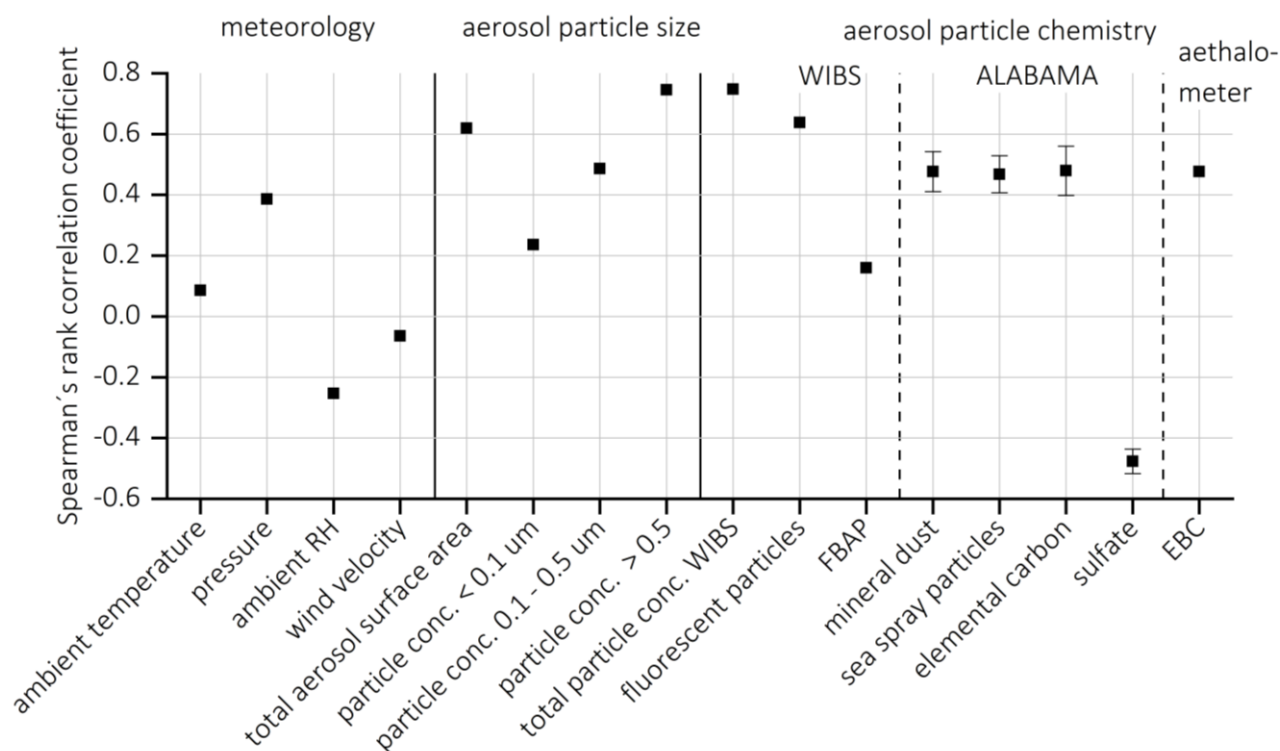

Figure S5: Spearman's rank correlation coefficients for  $[INP]_{-31}$  ( $> \text{LOD}$ ) with meteorological parameters, aerosol size distribution measurements, and aerosol particle chemistry determined with the WIBS (concentration all particles, fluorescent aerosol particles (FAP) and fluorescent biological aerosol particles (FBAP) within the size range of the instrument ( $> 0.5 \mu\text{m}$ )), the ALABAMA (mineral dust, sea spray particles, elemental carbon, sulfate, see section 3.3, error bar represents the standard deviation) and with the aethalometer (elemental black carbon, eBC).

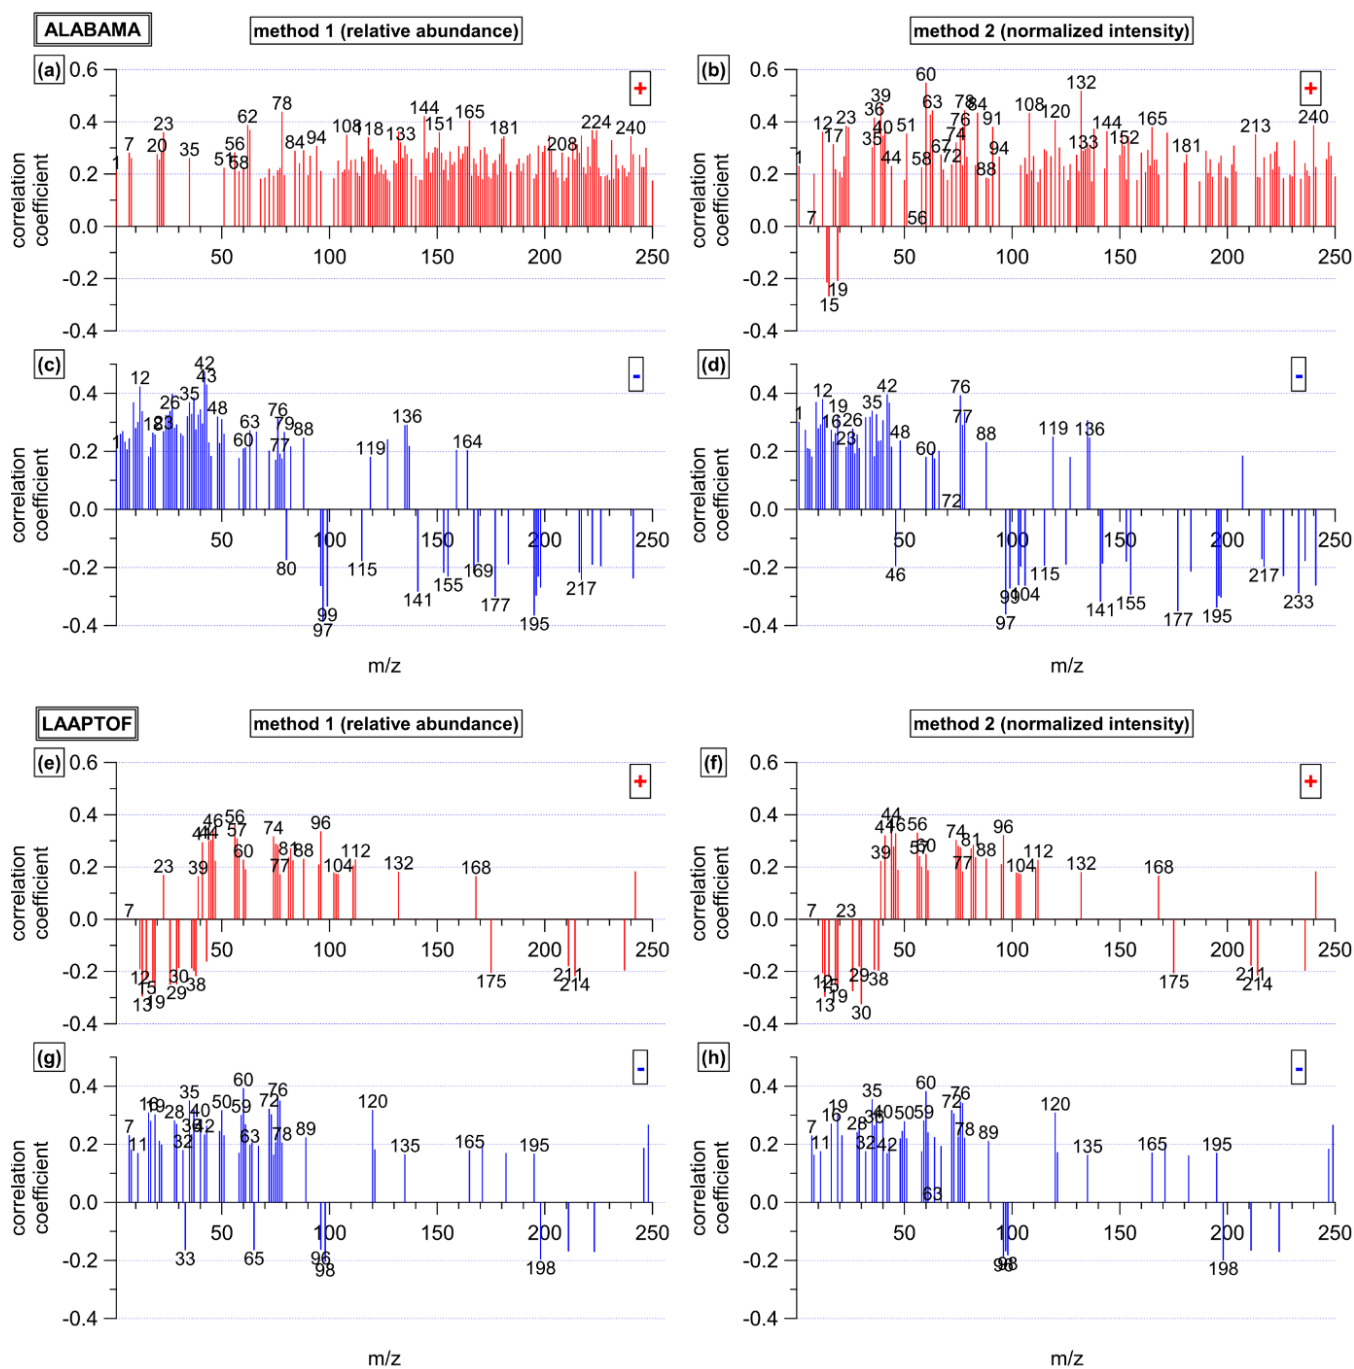

Figure S6: ALABAMA (panels a - d) and LAAPTOF (panels e - h) correlation coefficients of ions with  $n_s$  for method 1 (fraction of mass spectra containing a given ion) and 2 (relative ion signal).

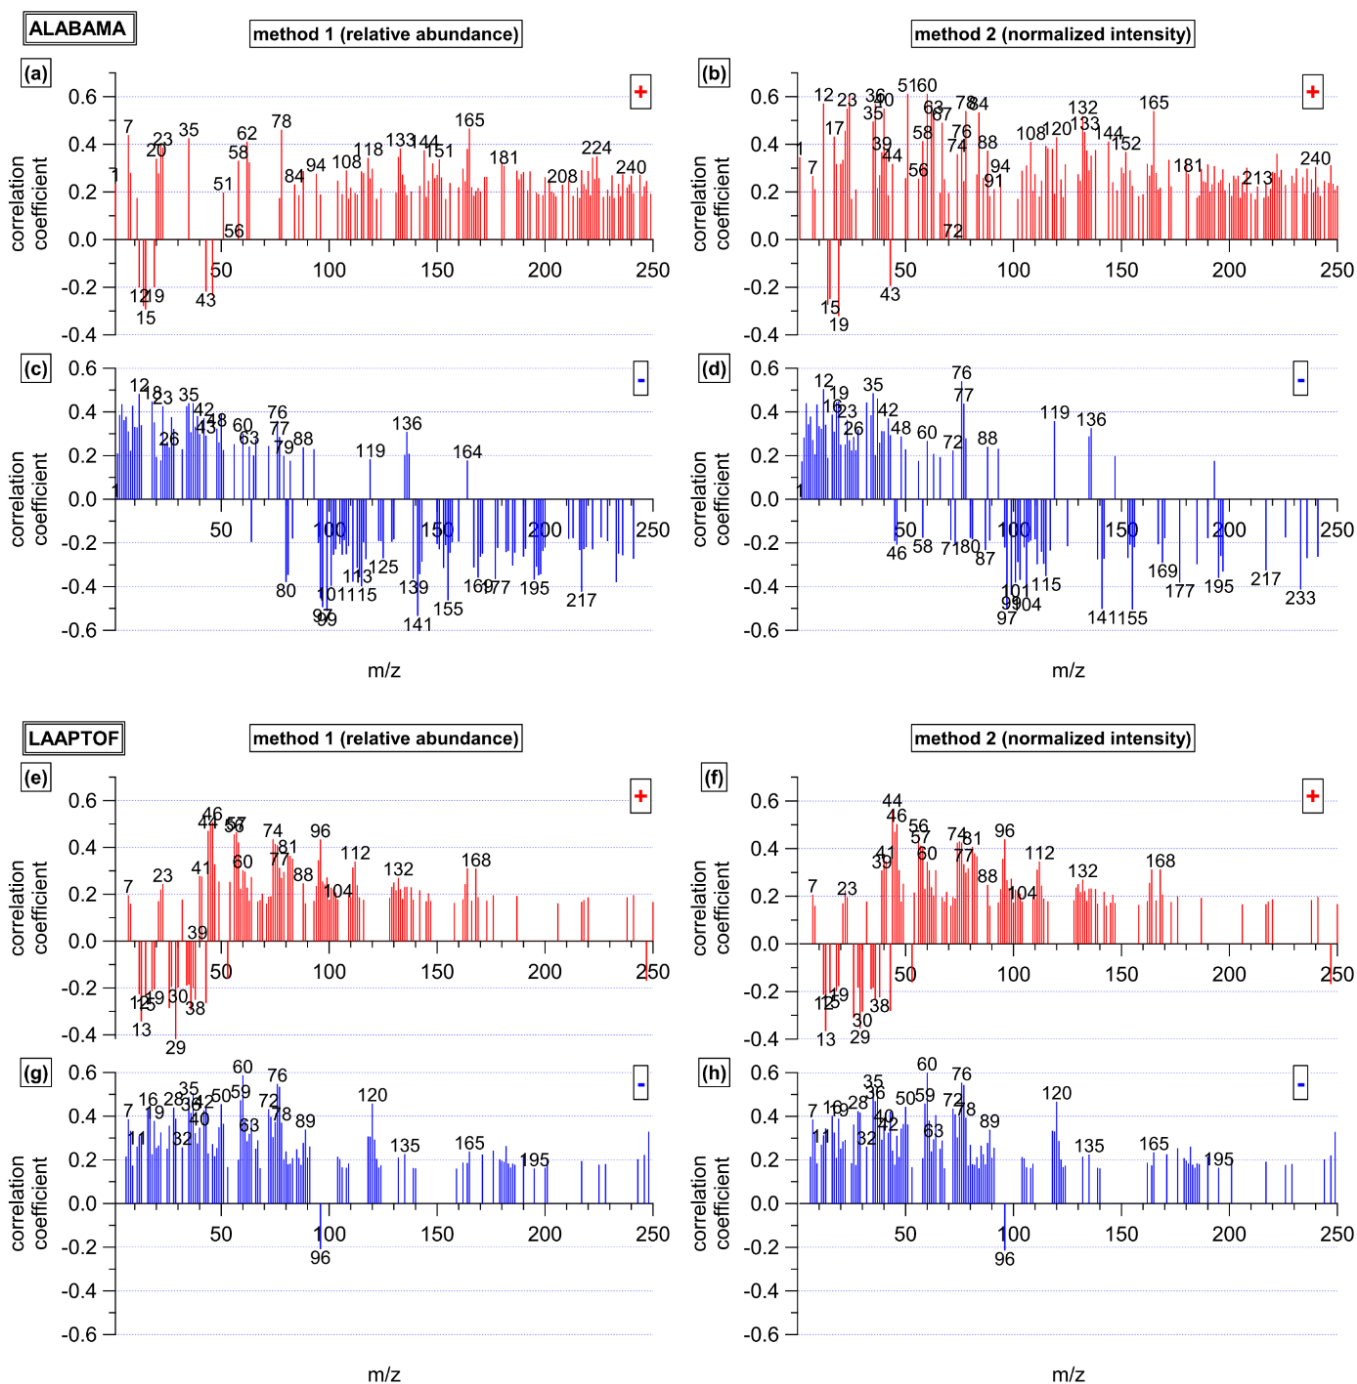

Figure S7: ALABAMA (panels a-d) and LAAPTOF (panels e - h) correlation coefficients of ions with  $[INP]_{-31}$  for method 1 (fraction of mass spectra containing a given ion) and 2 (relative ion signal).

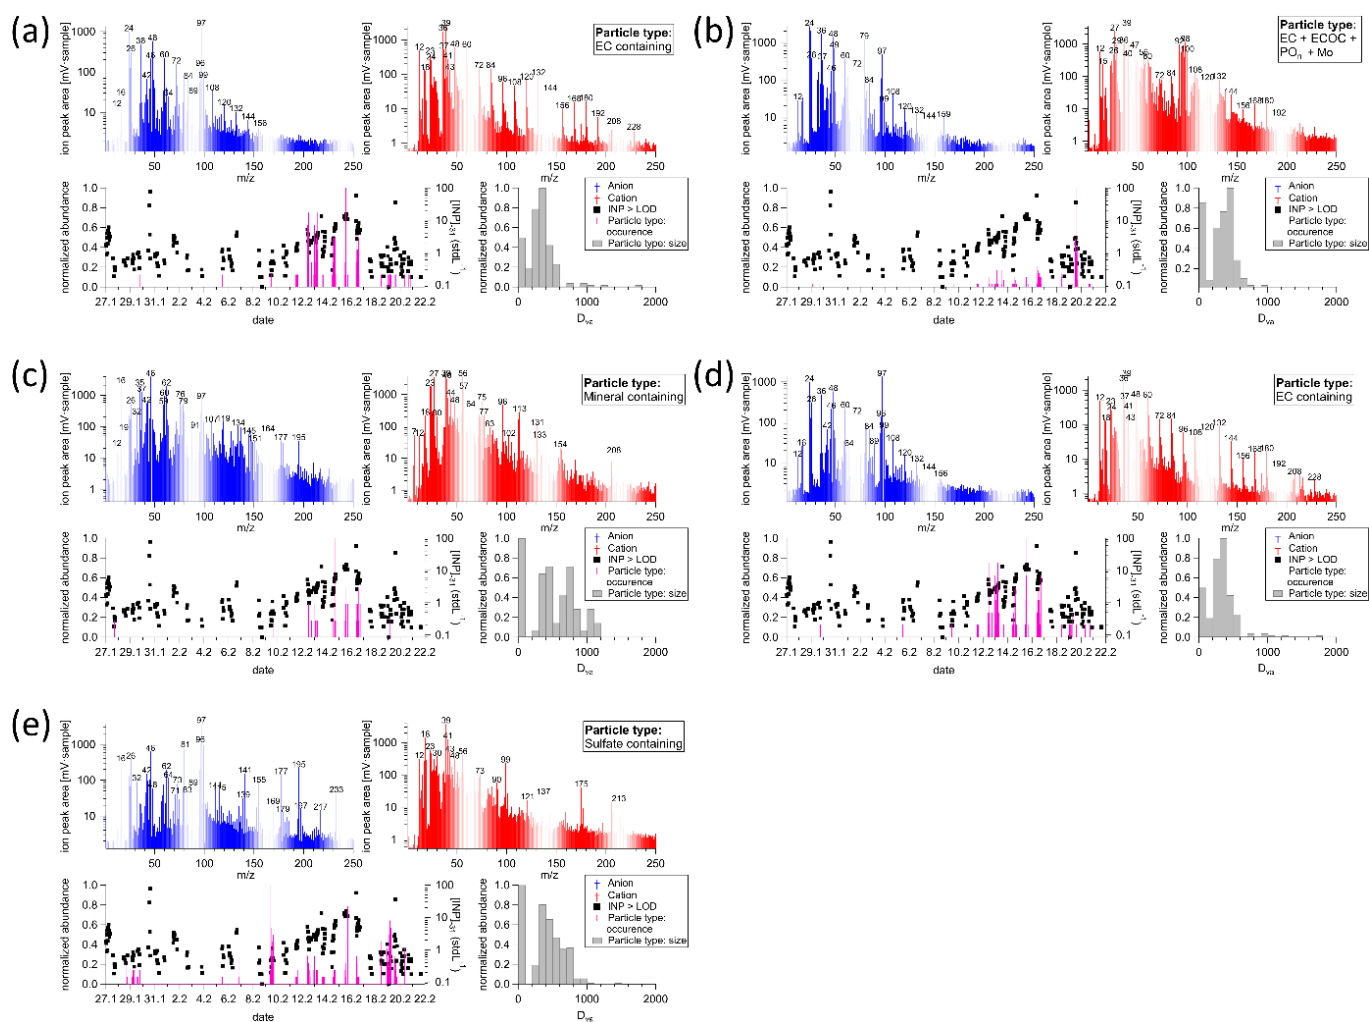

Figure S8: ALABAMA reference spectra for the identified EC-containing particle type (panel a), EC-containing particle type internally mixed with ECOC, phosphate and molybdenum (panel b), mineral dust (panel c), the identified aged sea spray containing particle type (panel d), and sulfate containing particles (panel e). Presented are the anion (blue) and the cation (red) mass spectra, as well as the normalized time series and the size distribution of this particle type.

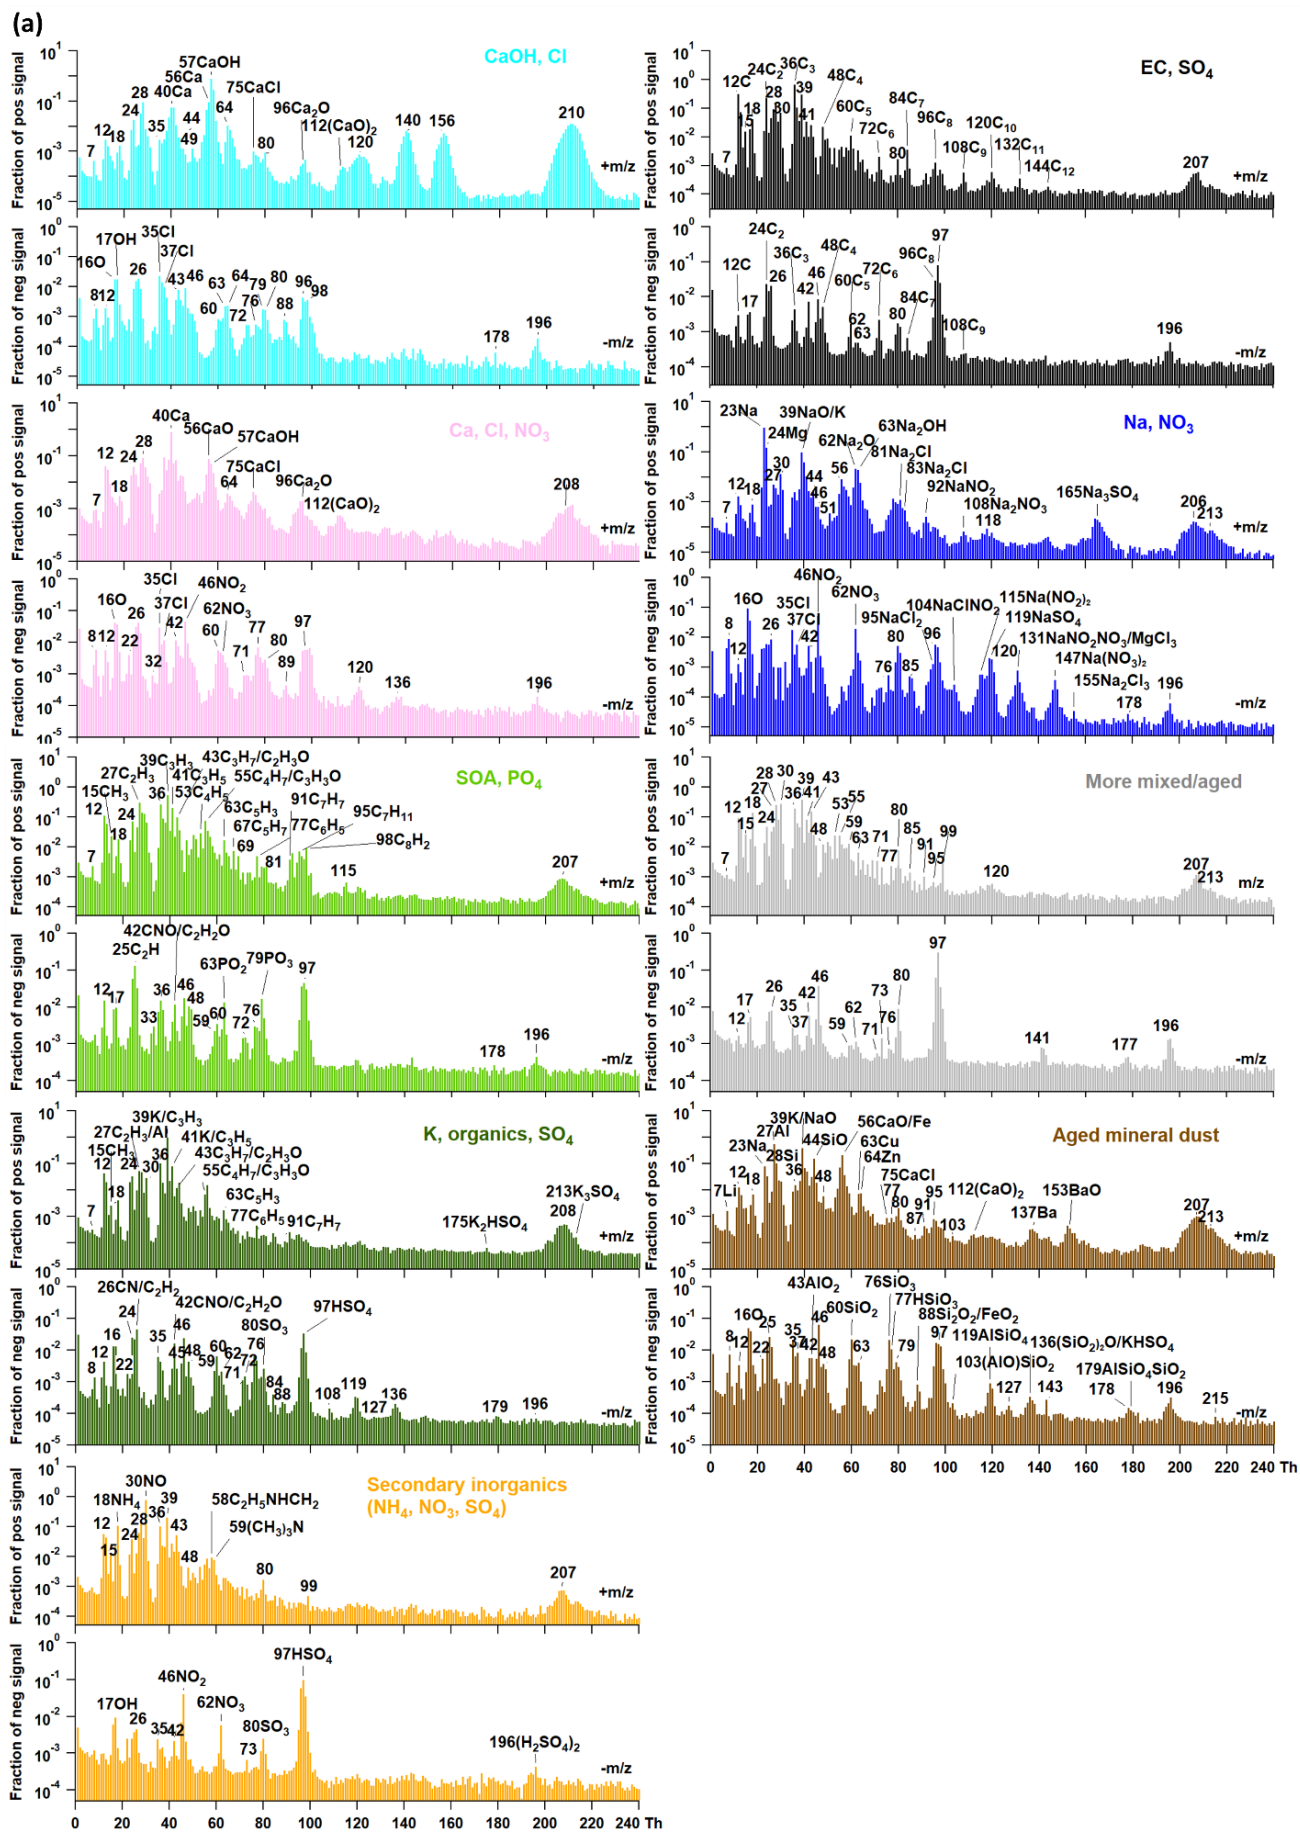



(b)

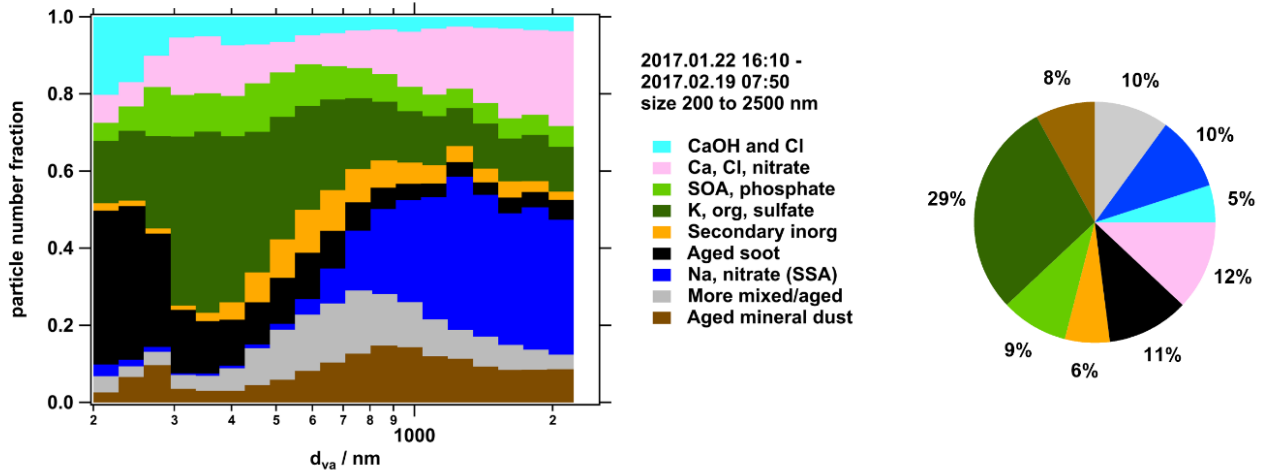

Figure S9: Representative mass spectra (panel a) of nine ambient particle classes measured during the field campaign INUIT-CLACE-2017 from January 22 to February 22, 2017. 26360 particles were detected and successfully ablated by LAAPTOF, resulting in corresponding mass spectra and size. The size resolved number fraction for nine particle classes is shown in panel (b). The percentage in the pie chart gives us information about the similarity of the total aerosols to different classes.

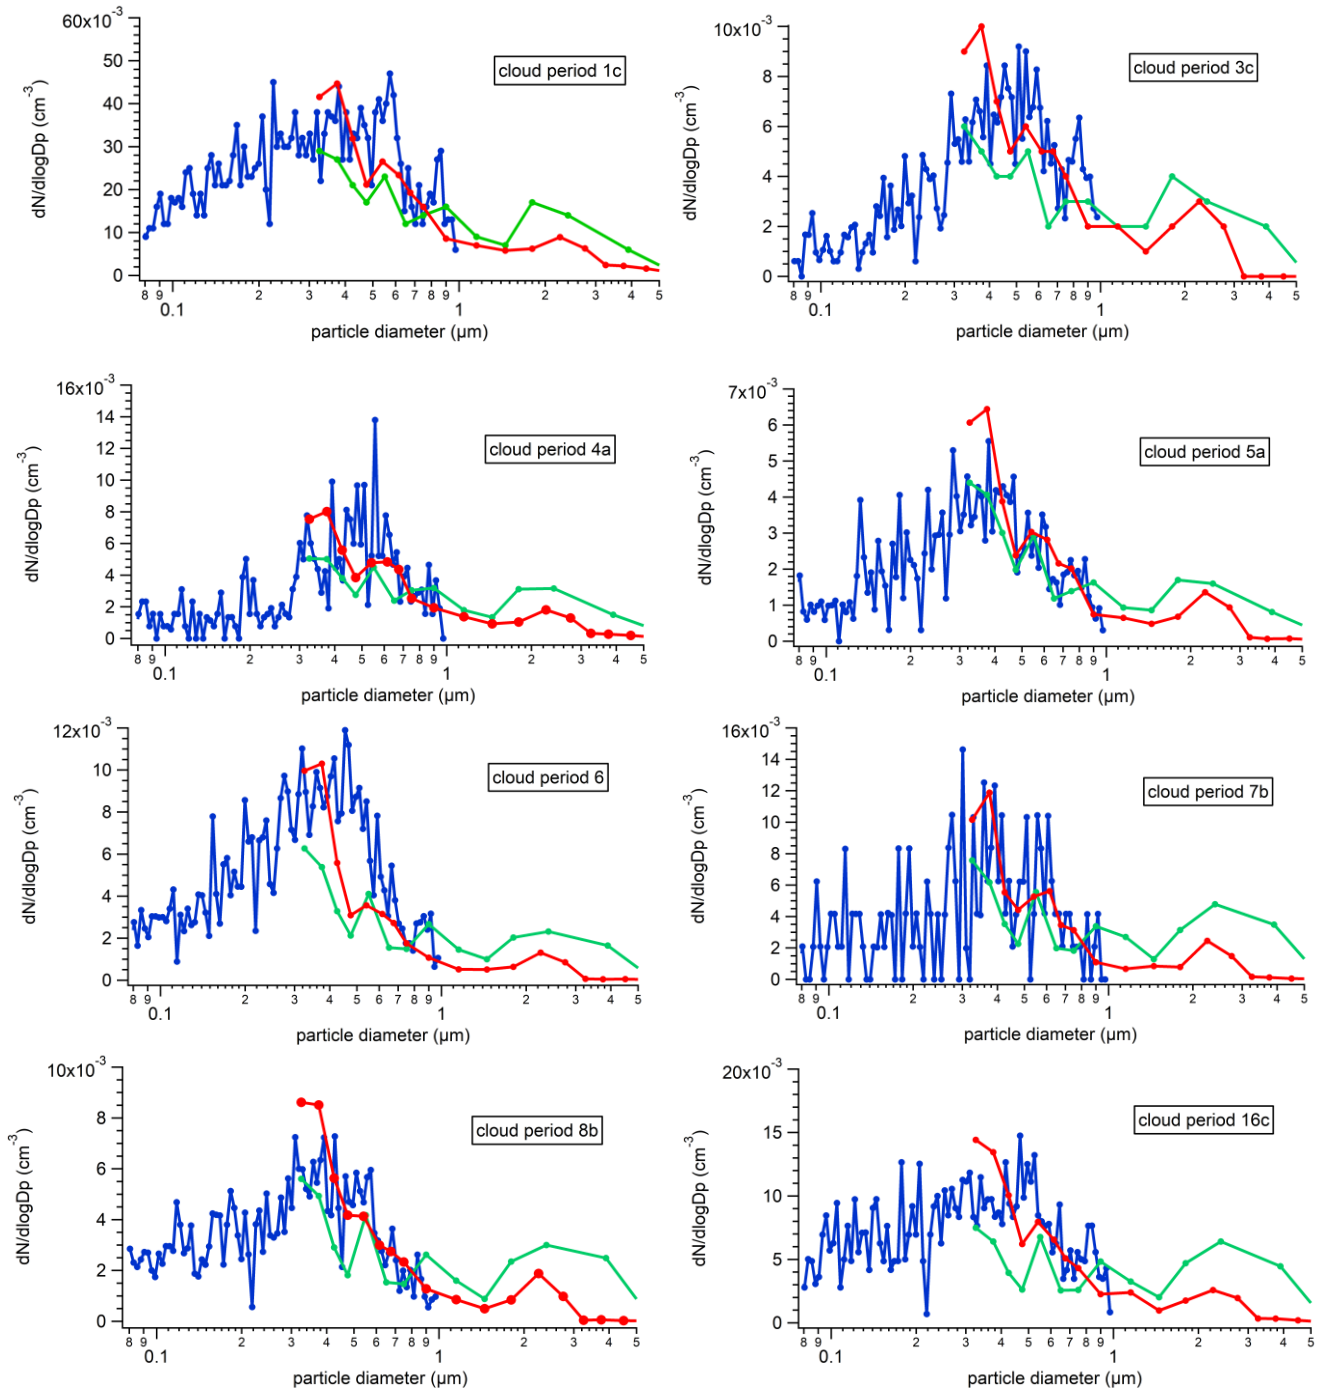

Figure S10: IPR number size distributions measured by UHSAS (blue), OPS (green) and Sky-OPC (red) during the indicated cloud periods (cf. Tab. A2). Due to the shape of the UHSAS number size distribution ( $R > 3$ , low fraction of small IPR) it is concluded that the relative contribution of secondary ice is reduced.

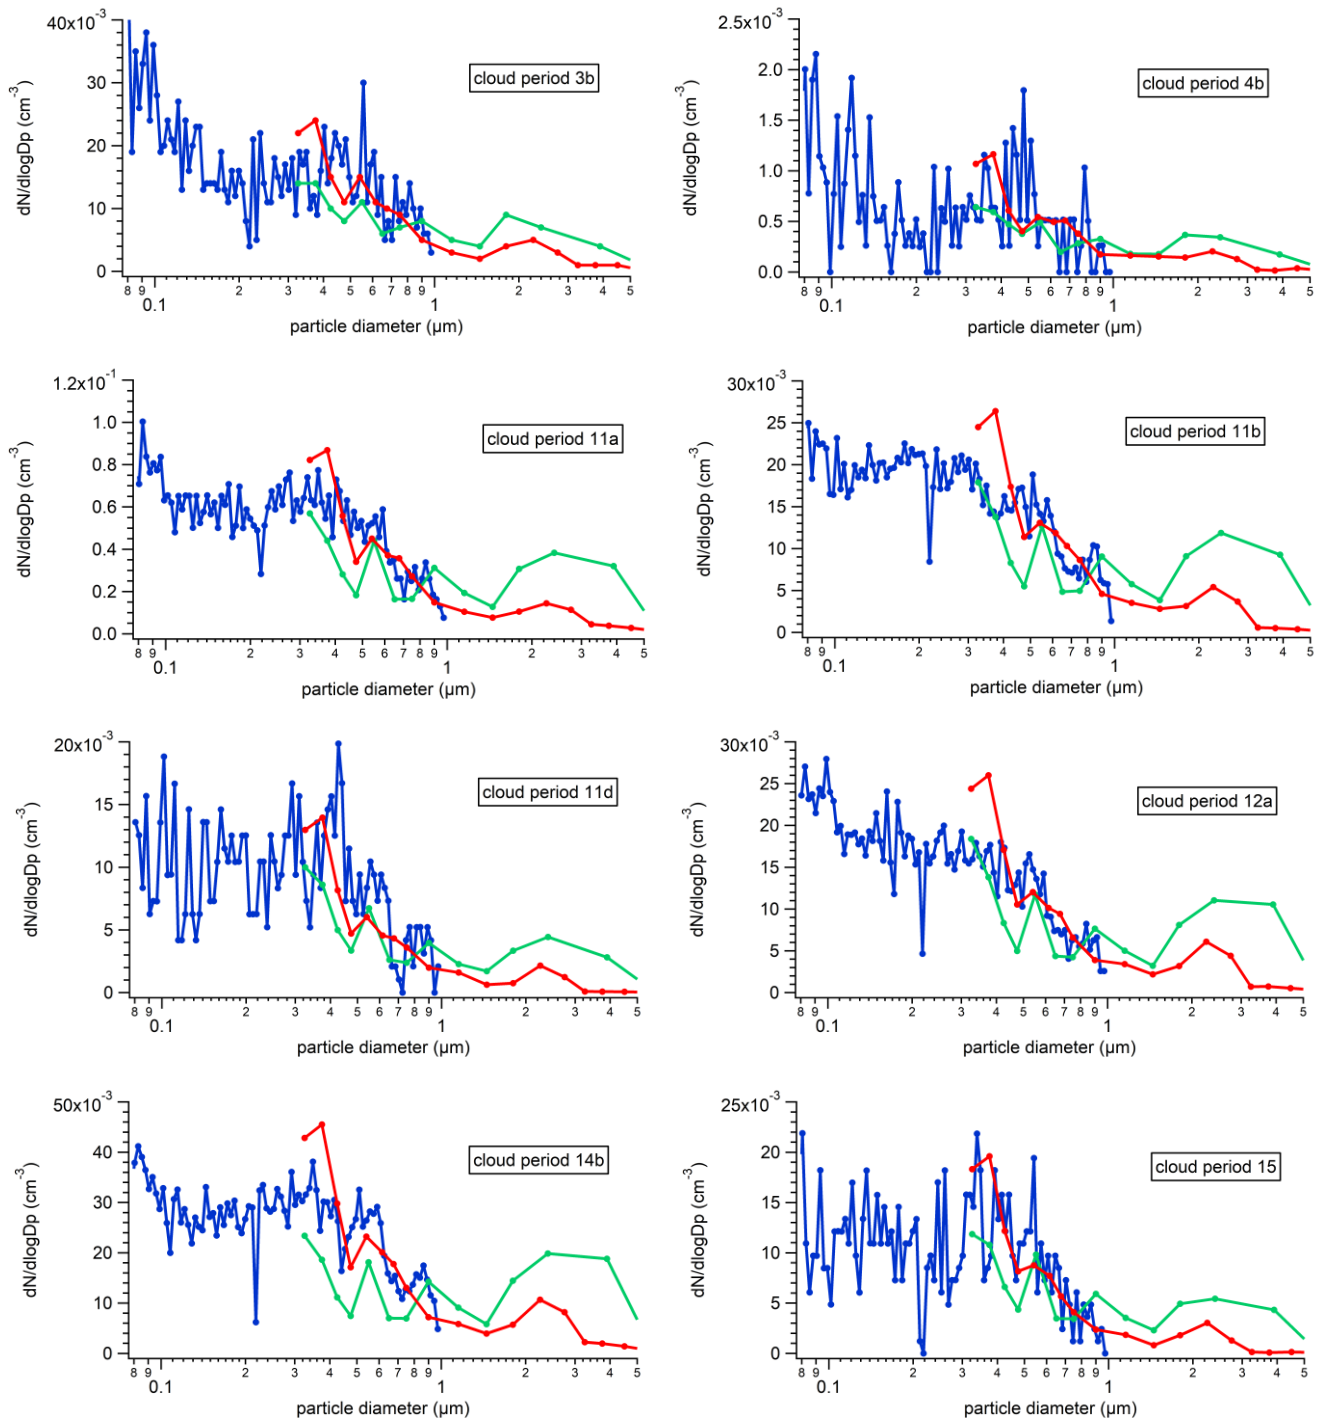

Figure S11: IPR number size distributions measured by UHSAS (blue), OPS (green) and Sky-OPC (red) during the indicated cloud periods (cf. Tab. A3). Due to the shape of the UHSAS number size distribution ( $R < 1$ , high fraction of small IPR) it is concluded that the relative contribution of secondary ice is enhanced.

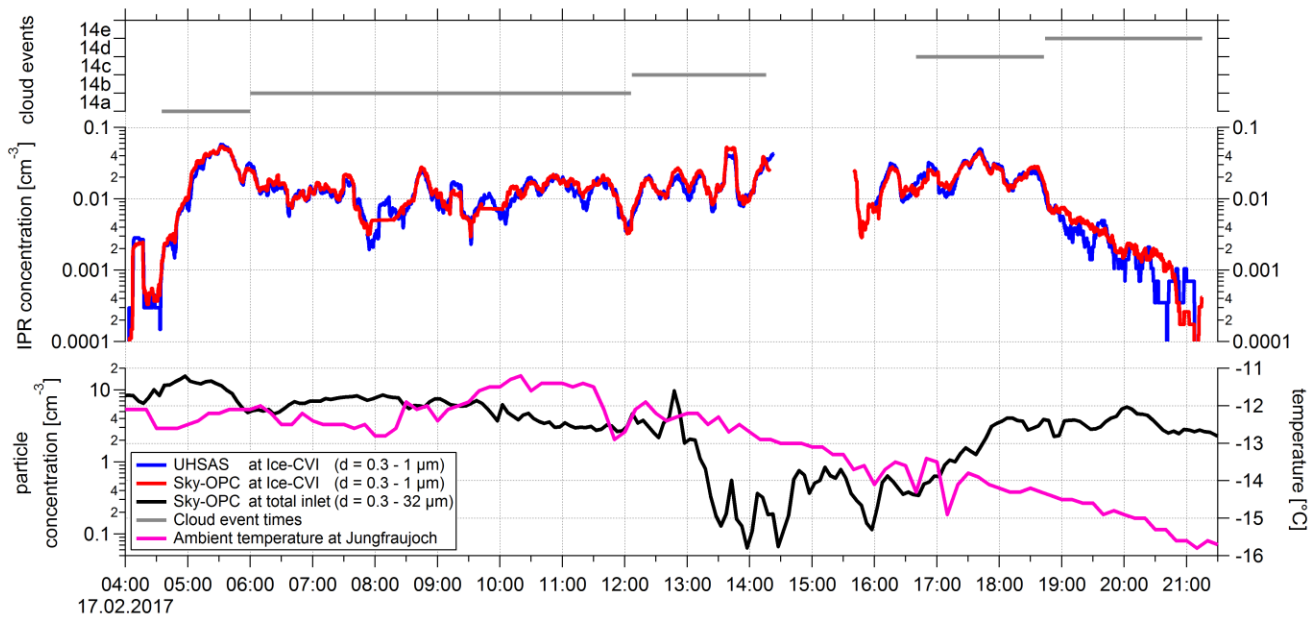

Figure S12: Time series of the IPR concentration in the size range  $0.3 - 1.0 \mu\text{m}$  during cloud event 14. The IPR concentration is calculated from the UHSAS and Sky-OPC measurements downstream of the Ice-CVI (blue and red lines, respectively). The total ambient particle concentration in the size range  $0.3 - 1.0 \mu\text{m}$  is calculated from the Sky-OPC measurements downstream of the total inlet (black line). The grey horizontal bars show the different cloud periods 14a - e. The IPR concentration of about  $25 \text{ L}^{-1}$  ( $0.3 \mu\text{m} - 1 \mu\text{m}$ ) and the total particle concentration ( $0.3 \mu\text{m} - 32 \mu\text{m}$ ) had their maximum during cloud period 14a. The IPR concentration only slightly decreased, remaining at a relatively high level, until 14c, before coming close to 14a again during cloud period 14d. At the same time, the total ambient particle concentration ( $0.3 \mu\text{m} - 32 \mu\text{m}$ ) during 14c reached its minimum within the cloud event before the concentration increased again during 14d. During cloud period 14e the total ambient particle concentration remains almost constant, whereas the strongly decreasing IPR concentration indicates the end of the cloud event. The temperature measured at the JFJ shows only slight fluctuations between 14a and 14b, whereas it started to decrease from 14c on. Since the temperatures between 14a and 14e were measured inside the cloud, the temperature always depends to a certain extent on the changing cloud characteristics and the amount of existing water vapor. The size distributions measured during the cloud periods 1a-e are shown in Fig. S14.

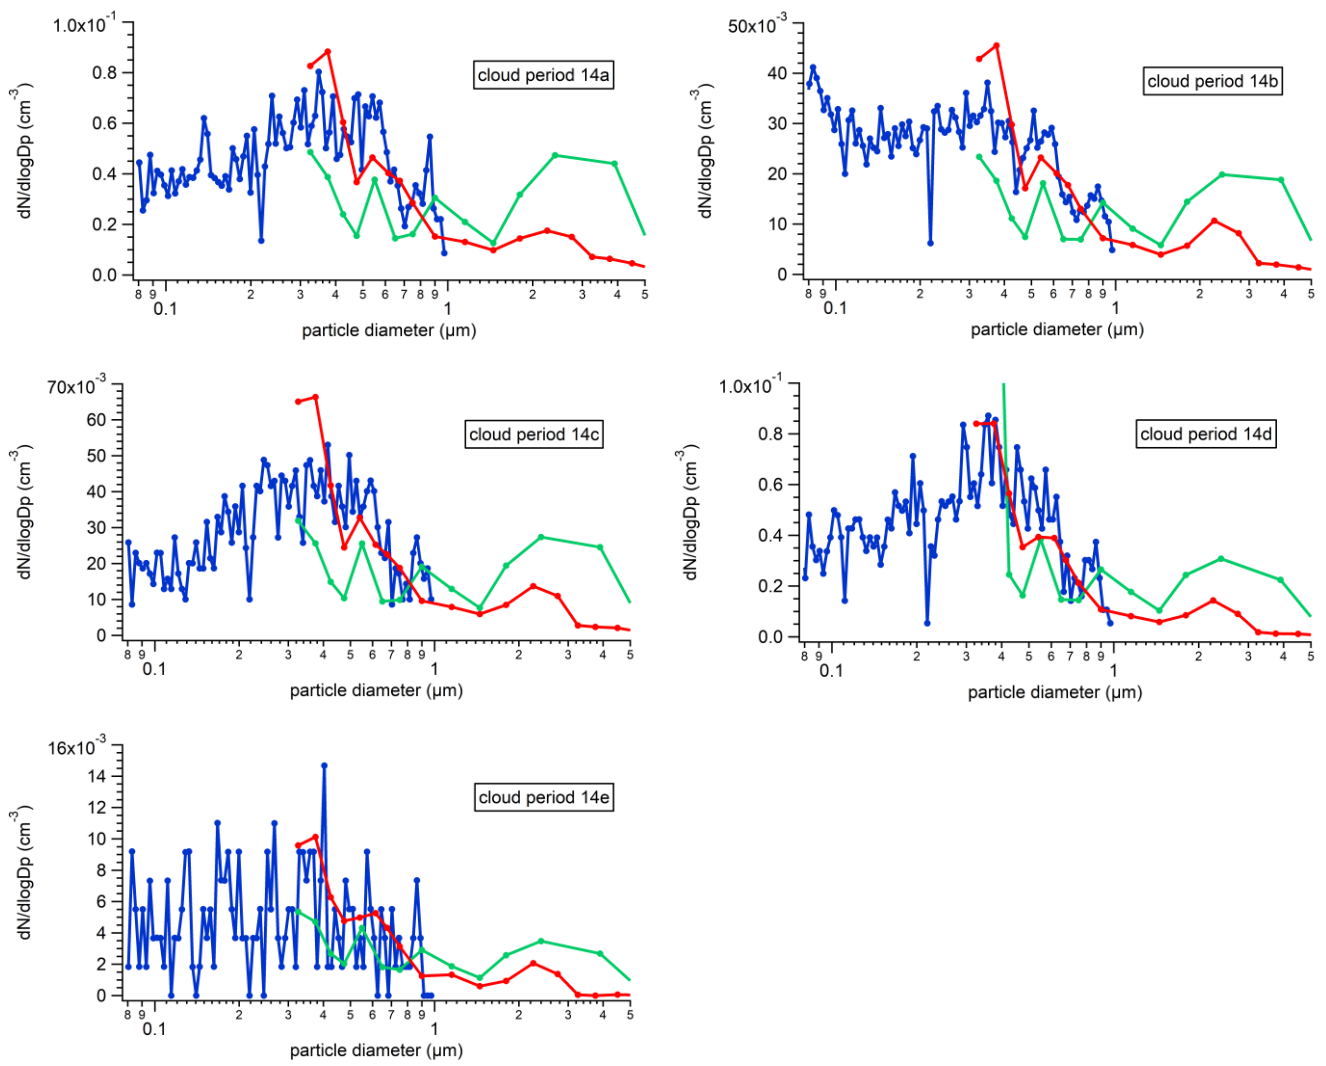

Figure S13: IPR number size distribution averaged as sub-periods of cloud event 14 when IPR properties were rather constant. Blue, green and red lines denote results from the UHSAS, OPS and Sky-OPC.

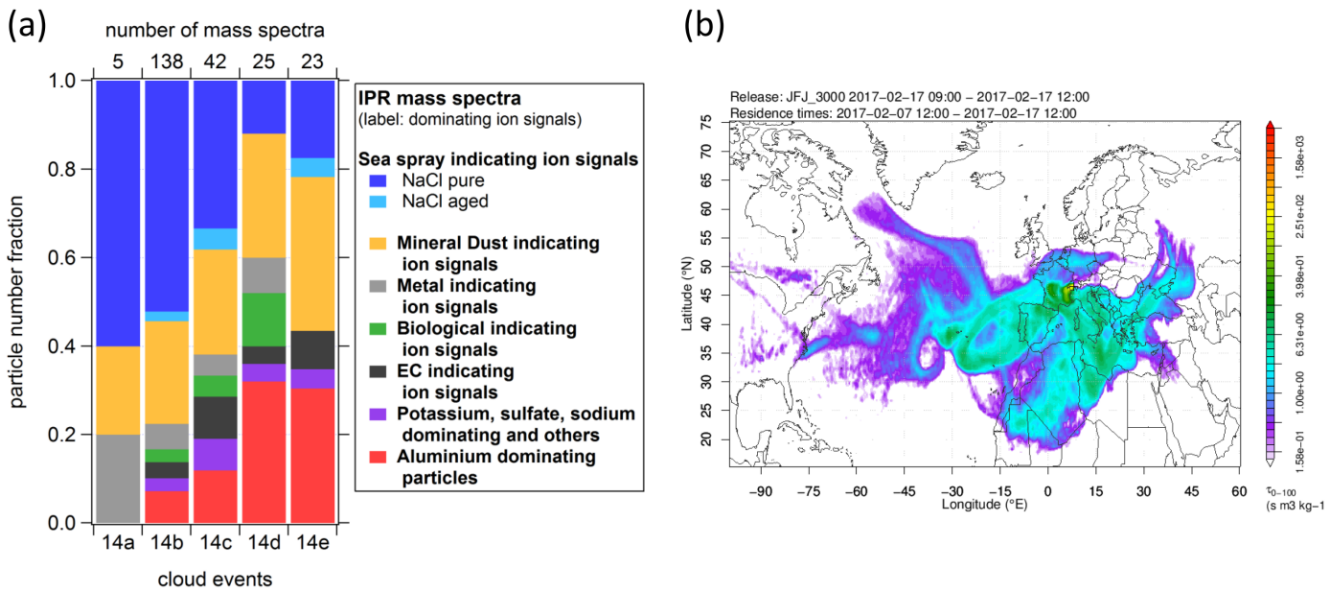

Figure S14: (a) Temporal evolution of the IPR fractions during the same cloud event as discussed in Fig. S12 (cloud event 14 at 17.02.2017 between 04:30 and 21:20), separated in five cloud periods (see more details Tab. S3). The pure NaCl type dominated the measured IPR composition at the beginning of the cloud event (cloud period 14a), before its fraction gradually decreased over time. (b) The source sensitivities at the surface determined by FLEXPART-COSMO are shown here as a footprint plot, calculated for 10 days backward for a release time at JFJ at 17.02.2017, 09:00 – 12:00. These data indicate an increased marine influence from the Atlantic Ocean and the Mediterranean Sea during this cloud event, which is a possible explanation for the presence of the pure and aged NaCl IPR type.

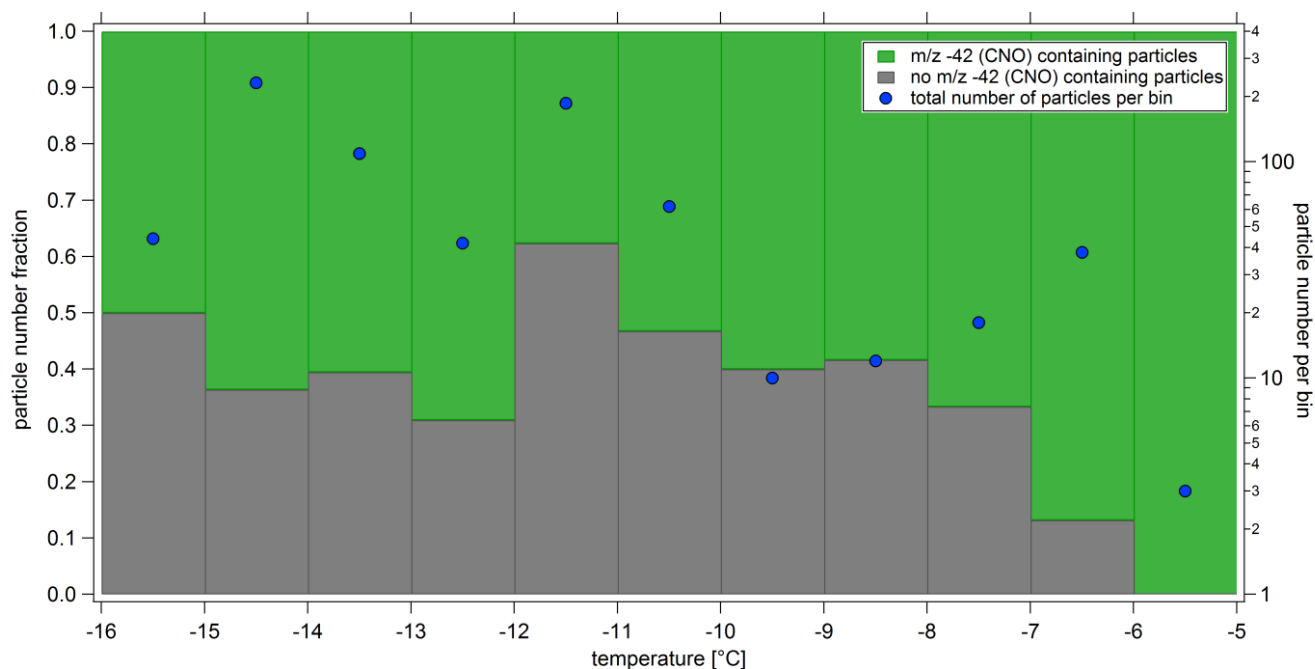

Figure S15: Number fraction of particles containing  $\text{CNO}^-$  ( $m/z$  42) and of particles not containing  $\text{CNO}^-$  detected by the ALABAMA as a function of ambient temperature (1-K intervals) during all cloud events. The ion  $m/z$  42 ( $\text{CNO}^-$ ) was used because it was frequently detected in analyses of particles of biological origin (e.g. Clemen et al., 2020; Marsden et al., 2019; Cornwell et al., 2019; Zawadowicz et al., 2017; Pratt et al., 2009, Schmidt et al., 2017). An increasing fraction of the particle spectra contains a signal at 42 ( $\text{CNO}^-$ ) with increasing temperatures. The ice activation at temperatures around  $-15$  to  $-13^\circ\text{C}$  for dust particles could be explained by traces of biogenic material, because surface dust frequently contains biological material (e.g., Conen et al., 2011; Fröhlich-Novoiisky et al., 2015; O'Sullivan et al., 2014; Zawadowicz et al., 2017). Furthermore, the observation that  $\text{CNO}^-$  could have an influence on ice activity is supported by the correlation analysis of the  $n_s$ -time series with the  $m/z$  values (see Sect. 3.3), where  $m/z$  42 was the anion with the highest correlation coefficient with  $n_s$  (for ALABAMA) in both method 1 and method 2 (see Fig. 4 in the main text).

Table S1: List of FLEXPART country specific selection of desert surface areas, with partially semi-arid or arid areas.

|                                |                      |                |
|--------------------------------|----------------------|----------------|
| Bahrain                        | Oman                 | Libya          |
| Gaza Strip                     | Qatar                | Mali           |
| Iran                           | Saudi Arabia         | Mauritania     |
| Iraq                           | Syria                | Morocco        |
| Iraq Saudi Arabia Neutral Zone | United Arab Emirates | Niger          |
| Israel                         | Algeria              | Senegal        |
| Jordan                         | Cape Verde           | Sudan          |
| Kuwait                         | Chad                 | Tunisia        |
| Lebanon                        | Egypt                | Western Sahara |

Table S2: Dates, duration and mean IPR number concentration in different particle size ranges of cloud periods with a lower contribution of small IPR (see also Fig. S10). Numbers are inferred from <sup>a)</sup> UHSAS, <sup>b)</sup> OPS and <sup>c)</sup> SKY-OPC measurements.

| period                       | beginning              | ending                 | duration<br>[hh:mm:ss] | N <sub>IPR</sub> [L <sup>-1</sup> ] <sup>a)</sup><br>(0.08-0.3 μm) | N <sub>IPR</sub> [L <sup>-1</sup> ] <sup>a)</sup><br>(0.3-1.0 μm) | N <sub>IPR</sub> [L <sup>-1</sup> ] <sup>b)</sup><br>(0.3-1.0 μm) | N <sub>IPR</sub> [L <sup>-1</sup> ] <sup>c)</sup><br>(0.3-1.0 μm) | N <sub>IPR</sub> [L <sup>-1</sup> ] <sup>b)</sup><br>(1.0-5.0 μm) | N <sub>IPR</sub> [L <sup>-1</sup> ] <sup>c)</sup><br>(1.0-5.0 μm) |
|------------------------------|------------------------|------------------------|------------------------|--------------------------------------------------------------------|-------------------------------------------------------------------|-------------------------------------------------------------------|-------------------------------------------------------------------|-------------------------------------------------------------------|-------------------------------------------------------------------|
| 1c                           | 27.01.2017<br>07:00:02 | 27.01.2017<br>09:09:52 | 02:09:50               | 13.3                                                               | 14.6                                                              | 11.5                                                              | 14.0                                                              | 6.0                                                               | 3.0                                                               |
| 3c                           | 30.01.2017<br>16:31:02 | 31.01.2017<br>00:59:50 | 08:28:48               | 1.2                                                                | 2.9                                                               | 2.4                                                               | 3.2                                                               | 1.4                                                               | 0.7                                                               |
| 4a                           | 31.01.2017<br>16:17:03 | 31.01.2017<br>21:31:52 | 05:14:49               | 0.9                                                                | 2.6                                                               | 2.2                                                               | 2.6                                                               | 1.4                                                               | 0.5                                                               |
| 5a                           | 02.02.2017<br>10:40:04 | 02.02.2017<br>20:54:52 | 10:14:48               | 1.1                                                                | 1.4                                                               | 1.4                                                               | 1.8                                                               | 0.7                                                               | 0.3                                                               |
| 6                            | 03.02.2017<br>16:44:02 | 03.02.2017<br>23:21:51 | 06:37:49               | 2.6                                                                | 3.2                                                               | 2.7                                                               | 2.4                                                               | 1.3                                                               | 0.3                                                               |
| 7b                           | 04.02.2017<br>18:09:08 | 04.02.2017<br>19:40:57 | 01:31:50               | 1.8                                                                | 2.7                                                               | 3.3                                                               | 3.6                                                               | 1.3                                                               | 0.7                                                               |
| 8b                           | 06.02.2017<br>00:00:02 | 06.02.2017<br>15:22:59 | 15:22:57               | 1.8                                                                | 2.0                                                               | 2.5                                                               | 2.4                                                               | 0.9                                                               | 0.4                                                               |
| 16c                          | 21.02.2017<br>11:01:01 | 21.02.2017<br>14:19:50 | 03:18:49               | 4.0                                                                | 4.1                                                               | 3.9                                                               | 4.3                                                               | 1.8                                                               | 0.7                                                               |
| duration weighted mean (all) |                        |                        | 52:59:40               | 1.7                                                                | 2.5                                                               | 2.3                                                               | 2.6                                                               | 1.0                                                               | 0.4                                                               |



Table S3: Dates, duration and mean IPR number concentration in different particle size ranges of cloud periods with a higher contribution of small IPR (see also Fig. S11). The cloud periods 3b, 4b, 14b, 15 approached the measurement site from north west (NW) and the cloud periods 11a, 11b, 11d, 12a from south east (SE). Same information of duration averaged cloud periods (all periods, NW and SE events) are given at the bottom. Numbers are inferred from <sup>a)</sup> UHSAS, <sup>b)</sup> OPS and <sup>c)</sup> SKY-OPC measurements.

| period                       | beginning              | ending                 | duration<br>[hh:mm:ss] | $N_{IPR} [L^{-1}]^a$<br>(0.08-0.3 $\mu m$ ) | $N_{IPR} [L^{-1}]^a$<br>(0.3-1.0 $\mu m$ ) | $N_{IPR} [L^{-1}]^b$<br>(0.3-1.0 $\mu m$ ) | $N_{IPR} [L^{-1}]^c$<br>(0.3-1.0 $\mu m$ ) | $N_{IPR} [L^{-1}]^b$<br>(1.0-5.0 $\mu m$ ) | $N_{IPR} [L^{-1}]^c$<br>(1.0-5.0 $\mu m$ ) |
|------------------------------|------------------------|------------------------|------------------------|---------------------------------------------|--------------------------------------------|--------------------------------------------|--------------------------------------------|--------------------------------------------|--------------------------------------------|
| 3b                           | 30.01.2017<br>10:33:09 | 30.01.2017<br>13:44:59 | 03:11:50               | 10.9                                        | 6.9                                        | 5.7                                        | 3.2                                        | 1.4                                        | 0.7                                        |
| 4b                           | 31.01.2017<br>22:56:03 | 01.02.2017<br>10:24:01 | 11:27:58               | 0.4                                         | 0.3                                        | 0.2                                        | 0.3                                        | 0.2                                        | 0.1                                        |
| 11a                          | 10.02.2017<br>01:13:04 | 10.02.2017<br>02:59:53 | 01:46:50               | 35.8                                        | 23.2                                       | 26.1                                       | 25.1                                       | 11.4                                       | 5.0                                        |
| 11b                          | 10.02.2017<br>03:00:03 | 10.02.2017<br>12:06:51 | 09:06:48               | 11.2                                        | 6.5                                        | 7.9                                        | 7.7                                        | 3.4                                        | 1.5                                        |
| 11d                          | 10.02.2017<br>14:44:09 | 10.02.2017<br>16:53:58 | 02:09:50               | 5.8                                         | 4.1                                        | 4.3                                        | 3.6                                        | 1.2                                        | 0.5                                        |
| 12a                          | 12.02.2017<br>03:30:06 | 12.02.2017<br>08:46:55 | 05:16:49               | 10.8                                        | 5.9                                        | 7.5                                        | 7.2                                        | 3.4                                        | 1.6                                        |
| 14b                          | 17.02.2017<br>06:00:08 | 17.02.2017<br>12:05:57 | 06:05:49               | 16.6                                        | 11.7                                       | 11.0                                       | 13.0                                       | 6.0                                        | 3.1                                        |
| 15                           | 20.02.2017<br>01:08:05 | 20.02.2017<br>02:42:54 | 01:34:50               | 6.1                                         | 4.8                                        | 5.7                                        | 5.2                                        | 1.7                                        | 0.7                                        |
| duration weighted mean (all) |                        |                        | 40:40:42               | 8.7                                         | 5.5                                        | 6.0                                        | 6.1                                        | 2.7                                        | 1.3                                        |
| duration weighted mean (NW)  |                        |                        | 22:20:27               | 5.3                                         | 3.7                                        | 3.5                                        | 4.0                                        | 1.8                                        | 0.9                                        |
| duration weighted mean (SE)  |                        |                        | 18:20:15               | 12.8                                        | 7.7                                        | 9.1                                        | 8.8                                        | 3.9                                        | 1.8                                        |

Table S4: Dates, duration and mean IPR number concentration in different particle size ranges of sub periods of cloud event 14. Numbers are inferred from <sup>a)</sup> UHSAS, <sup>b)</sup> OPS and <sup>c)</sup> SKY-OPC measurements.

| period | beginning              | ending                 | duration<br>[hh:mm:ss] | $N_{IPR} [L^{-1}]^a$<br>(0.08-0.3 $\mu m$ ) | $N_{IPR} [L^{-1}]^a$<br>(0.3-1.0 $\mu m$ ) | $N_{IPR} [L^{-1}]^b$<br>(0.3-1.0 $\mu m$ ) | $N_{IPR} [L^{-1}]^c$<br>(0.3-1.0 $\mu m$ ) | $N_{IPR} [L^{-1}]^b$<br>(1.0-5.0 $\mu m$ ) | $N_{IPR} [L^{-1}]^c$<br>(1.0-5.0 $\mu m$ ) |
|--------|------------------------|------------------------|------------------------|---------------------------------------------|--------------------------------------------|--------------------------------------------|--------------------------------------------|--------------------------------------------|--------------------------------------------|
| 14a    | 17.02.2017<br>04:35:08 | 17.02.2017<br>05:59:58 | 01:24:50               | 25.0                                        | 25.4                                       | 23.5                                       | 26.2                                       | 13.9                                       | 6.7                                        |
| 14b    | 17.02.2017<br>06:00:08 | 17.02.2017<br>12:05:57 | 06:05:49               | 16.6                                        | 11.7                                       | 11.0                                       | 13.0                                       | 6.0                                        | 3.1                                        |
| 14c    | 17.02.2017<br>12:06:07 | 17.02.2017<br>14:15:56 | 02:09:49               | 15.1                                        | 16.4                                       | 15.2                                       | 18.5                                       | 8.1                                        | 4.2                                        |
| 14d    | 17.02.2017<br>16:40:03 | 17.02.2017<br>18:42:52 | 02:02:49               | 24.6                                        | 24.3                                       | --                                         | 23.7                                       | --                                         | 3.8                                        |
| 14e    | 17.02.2017<br>18:44:02 | 17.02.2017<br>21:14:52 | 02:30:50               | 2.7                                         | 2.3                                        | 2.6                                        | 2.9                                        | 1.0                                        | 0.5                                        |

## References

- Clemen, H.-C., Schneider, J., Klimach, T., Helleis, F., Köllner, F., Hünig, A., Rubach, F., Mertes, S., Wex, H., Stratmann, F., Welti, A., Kohl, R., Frank, F., and Borrmann, S.: Optimizing the detection, ablation, and ion extraction efficiency of a single-particle laser ablation mass spectrometer for application in environments with low aerosol particle concentrations, *Atmos. Meas. Tech.*, 13, 5923-5953, 10.5194/amt-13-5923-2020, 2020.
- Conen, F., Morris, C. E., Leifeld, J., Yakutin, M. V., and Alewell, C.: Biological residues define the ice nucleation properties of soil dust, *Atmos. Chem. Phys.*, 11, 9643-9648, 10.5194/acp-11-9643-2011, 2011.
- Cornwell, G. C., McCluskey, C. S., Levin, E. J. T., Suski, K. J., DeMott, P. J., Kreidenweis, S. M., and Prather, K. A.: Direct Online Mass Spectrometry Measurements of Ice Nucleating Particles at a California Coastal Site, *Journal of Geophysical Research: Atmospheres*, 124, 12157-12172, 10.1029/2019JD030466, 2019.
- Fröhlich-Nowoisky, J., Hill, T. C. J., Pummer, B. G., Yordanova, P., Franc, G. D., and Pöschl, U.: Ice nucleation activity in the widespread soil fungus *Mortierella alpina*, *Biogeosciences*, 12, 1057 -1071, 10.5194/bg-12-1057-2015, 2015.
- Herrmann, E., Weingartner, E., Henne, S., Vuilleumier, L., Bukowiecki, N., Steinbacher, M., Conen, F., Collaud Coen, M., Hammer, E., Jurányi, Z., Baltensperger, U., and Gysel, M.: Analysis of long-term aerosol size distribution data from Jungfraujoch with emphasis on free tropospheric conditions, cloud influence, and air mass transport, *J. Geophys. Res. Atmos.*, 120, 9459-9480, 10.1002/2015JD023660, 2015.
- Marsden, N. A., Ullrich, R., Möhler, O., Eriksen Hammer, S., Kandler, K., Cui, Z., Williams, P. I., Flynn, M. J., Liu, D., Allan, J. D., and Coe, H.: Mineralogy and mixing state of north African mineral dust by online single-particle mass spectrometry, *Atmos. Chem. Phys.*, 19, 2259-2281, 10.5194/acp-19-2259-2019, 2019.
- O'Sullivan, D., Murray, B. J., Malkin, T. L., Whale, T. F., Umo, N. S., Atkinson, J. D., Price, H. C., Baustian, K. J., Browse, J., and Webb, M. E.: Ice nucleation by fertile soil dusts: relative importance of mineral and biogenic components, *Atmos. Chem. Phys.*, 14, 1853-1867, 10.5194/acp-14-1853-2014, 2014.
- Pratt, K. A., DeMott, P. J., French, J. R., Wang, Z., Westphal, D. L., Heymsfield, A. J., Twohy, C. H., Prenni, A. J., and Prather, K. A.: In situ detection of biological particles in cloud ice-crystals, *Nature Geoscience*, 2, 398, 10.1038/ngeo521, 2009.
- Schmidt, S., Schneider, J., Klimach, T., Mertes, S., Schenk, L. P., Kupiszewski, P., Curtius, J., and Borrmann, S.: Online single particle analysis of ice particle residuals from mountain-top mixed-phase clouds using laboratory derived particle type assignment, *Atmos. Chem. Phys.*, 17, 575-594, 10.5194/acp-17-575-2017, 2017.
- Zawadowicz, M. A., Froyd, K. D., Murphy, D. M., and Cziczo, D. J.: Improved identification of primary biological aerosol particles using single-particle mass spectrometry, *Atmos. Chem. Phys.*, 17, 7193-7212, 10.5194/acp-17-7193-2017, 2017.
- Zellweger, C., Forrer, J., Hofer, P., Nyeki, S., Schwarzenbach, B., Weingartner, E., Ammann, M., and Baltensperger, U.: Partitioning of reactive nitrogen (NO<sub>y</sub>) and dependence on meteorological conditions in the lower free troposphere, *Atmos. Chem. Phys.*, 3, 779 - 796, 10.5194/acp-3-779-2003, 2003.
